# Supplementary material for: Development of a low-melting-point eutectic salt and evaluation of its discharge performance for light weight thermal batteries
Source: Royal Society of Chemistry journal article supplement (doi:10.1039/d2ra03436k), 2022-01-01
Supplement: d2ra03436k1.pdf [file d2ra03436k1.pdf]

# COMMUNICATION

## Supplementary Information

Received 00th January 20xx,  
Accepted 00th January 20xx

DOI: 10.1039/x0xx00000x

## Development of a low-melting-point eutectic salt and evaluation of its discharge performance for lightweight thermal batteries

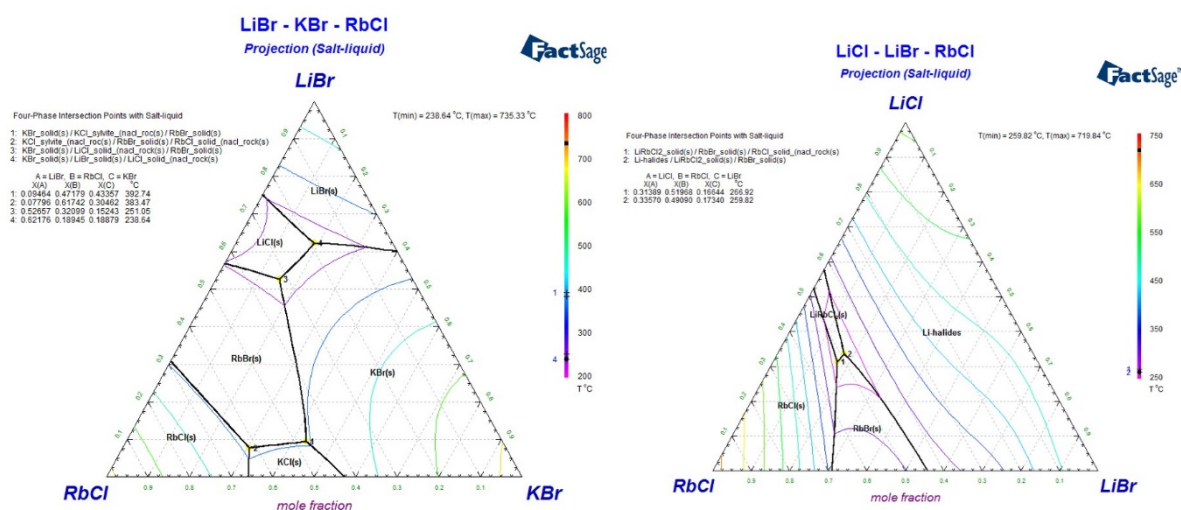

Fig S1. Calculated phase diagram of LiBr-KBr-RbCl and LiCl-LiBr-RbCl by the Factsage software

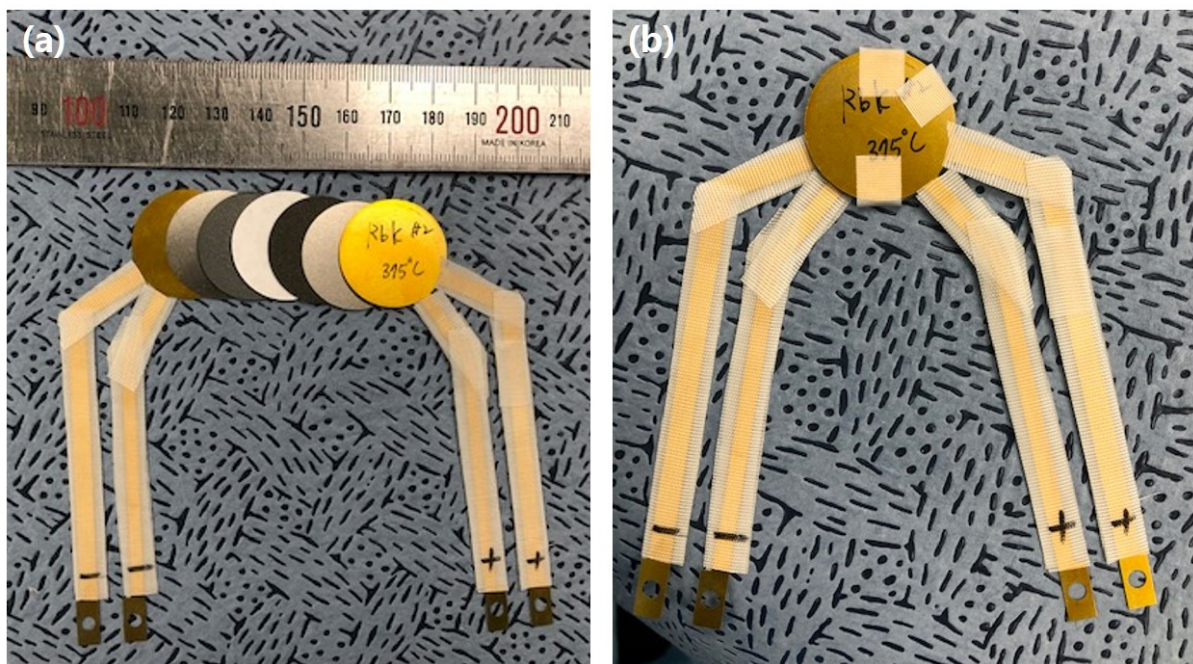

Fig S2. Single cell (a) before and (b) after assembly for battery discharging

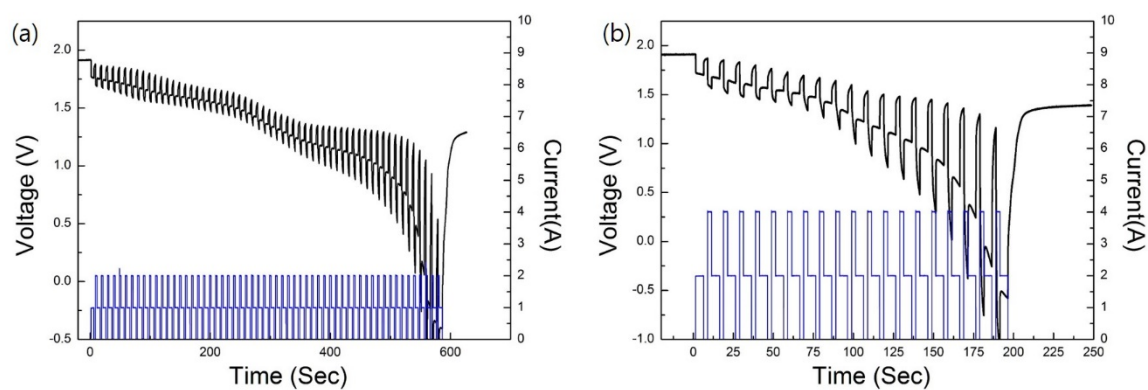

Fig S3. Discharge profiles after one month of storage in a dry room while applying a pulse high current density profile of (a) 1 A ( $0.2 \text{ A/cm}^2$ ) 2.5 s, 2 A 2.5 s ( $0.4 \text{ A/cm}^2$ ) 0 A 1 s,  $0.25 \text{ A}_{\text{avg}}/\text{cm}^2$  and (b) 2 A ( $0.4 \text{ A/cm}^2$ ) 2.5 s, 4 A 2.5 s ( $0.8 \text{ A/cm}^2$ ) 0 A 1 s,  $0.5 \text{ A}_{\text{avg}}/\text{cm}^2$

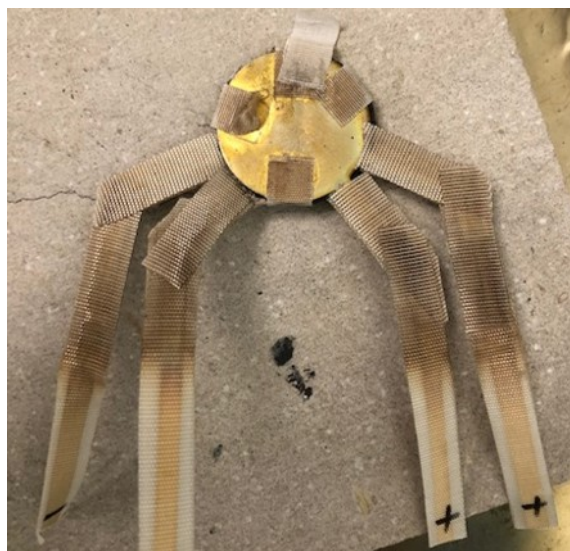

Fig S4. Assembled single cell after discharge

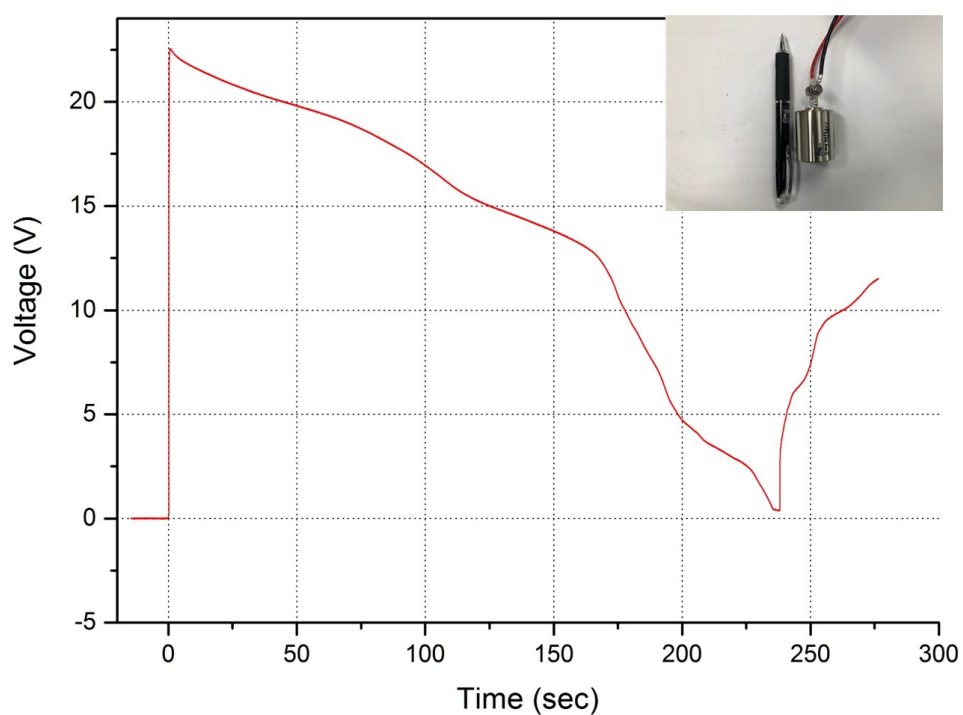

Fig S5. Image of a 12-cell stacked thermal battery and corresponding discharge profile under a high current of 3.1 A ( $0.6 \text{ A/cm}^2$ )
